# Supplementary material
Source: PubMed Central journal article supplement (PMC6794108)
Supplement: rccm.201806-1161OC_lim_data_supplement.pdf [file rccm.201806-1161OC_lim_data_supplement.pdf]

## **ONLINE DATA SUPPLEMENT**

Long-term Exposure to Ozone and Cause-Specific Mortality Risk in the U.S.

Figure E1. Annual average concentrations of air pollutants by study states (2002-2010)

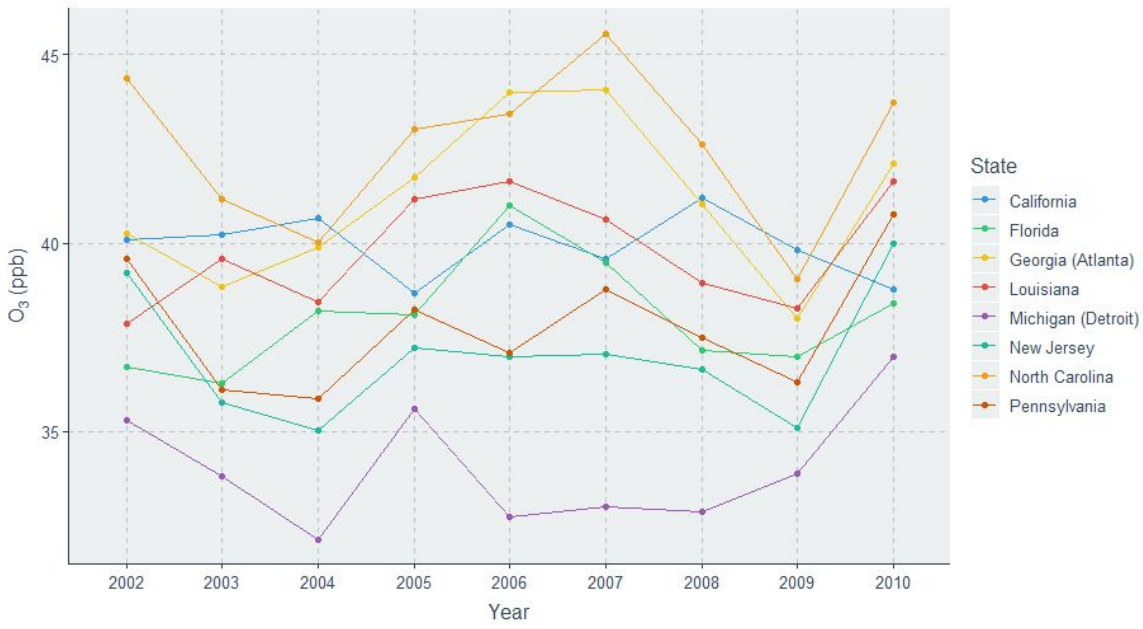

a) Annual average O<sub>3</sub> concentrations by study states (2002-2010)

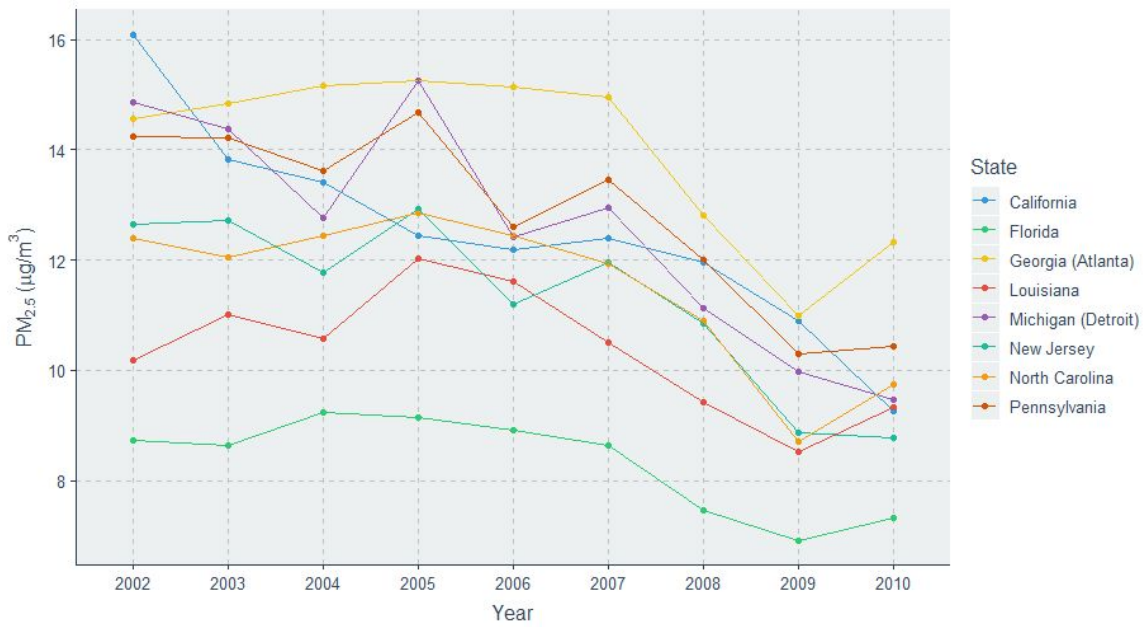

b) Annual average PM<sub>2.5</sub> concentrations by study states (2002-2010)

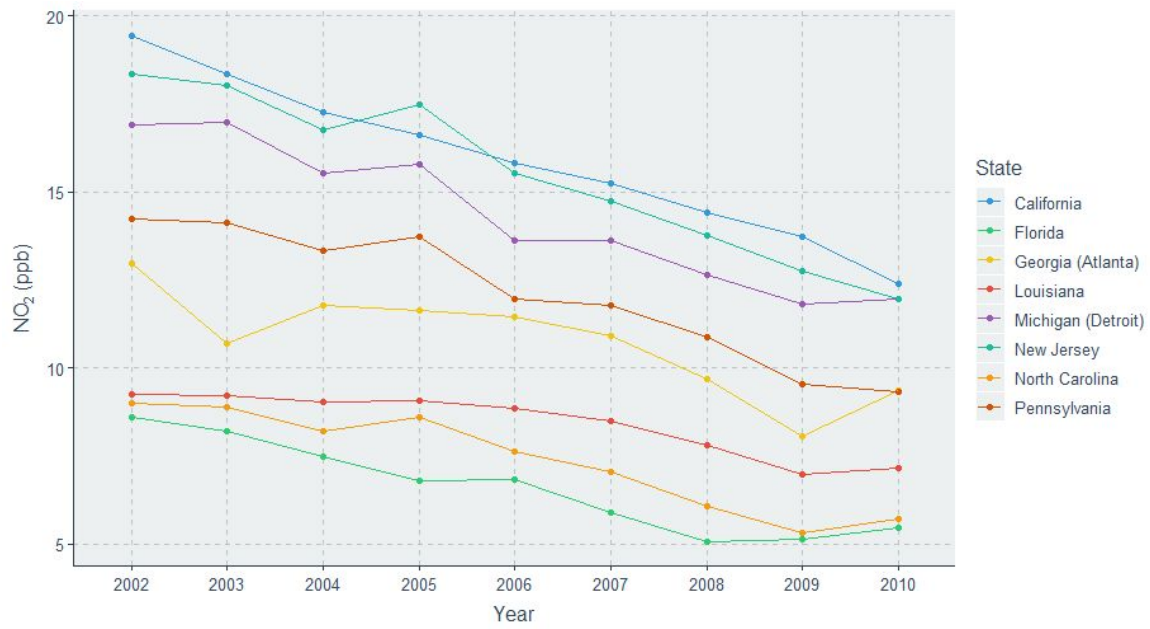

c) Annual average NO<sub>2</sub> concentrations by study states (2002-2010)

Table E1. All-cause and cause-specific mortality HRs associated with O<sub>3</sub> (per 10 ppb), for two-pollutant/exposure models

| Cause                         | Annual O <sub>3</sub> adjusting for PM <sub>2.5</sub> |           | Warm Season O <sub>3</sub> adjusting for PM <sub>2.5</sub> |           | Annual O <sub>3</sub> adjusting for NO <sub>2</sub> |           | Warm Season O <sub>3</sub> adjusting for NO <sub>2</sub> |           | Annual O <sub>3</sub> adjusting for T <sub>max</sub> |           | Warm Season O <sub>3</sub> adjusting for T <sub>max</sub> |           |
|-------------------------------|-------------------------------------------------------|-----------|------------------------------------------------------------|-----------|-----------------------------------------------------|-----------|----------------------------------------------------------|-----------|------------------------------------------------------|-----------|-----------------------------------------------------------|-----------|
|                               | HR*                                                   | 95% CI*   | HR*                                                        | 95% CI*   | HR*                                                 | 95% CI*   | HR*                                                      | 95% CI*   | HR*                                                  | 95% CI*   | HR*                                                       | 95% CI*   |
| All-cause                     | 0.99                                                  | 0.97-1.00 | 0.99                                                       | 0.98-1.00 | 0.99                                                | 0.98-1.01 | 1.00                                                     | 0.99-1.01 | 0.98                                                 | 0.96-1.00 | 0.99                                                      | 0.97-1.00 |
| Cardiovascular Disease        | 1.03                                                  | 1.00-1.05 | 1.02                                                       | 1.00-1.04 | 1.05                                                | 1.02-1.07 | 1.03                                                     | 1.01-1.05 | 1.00                                                 | 0.97-1.02 | 0.99                                                      | 0.98-1.02 |
| Ischemic Heart Disease        | 1.05                                                  | 1.02-1.08 | 1.03                                                       | 1.01-1.06 | 1.07                                                | 1.04-1.11 | 1.04                                                     | 1.02-1.07 | 1.01                                                 | 0.97-1.05 | 1.02                                                      | 1.00-1.05 |
| Cerebrovascular Disease       | 1.01                                                  | 0.95-1.07 | 1.02                                                       | 0.97-1.06 | 1.02                                                | 0.96-1.08 | 1.03                                                     | 0.98-1.07 | 0.93                                                 | 0.87-0.99 | 0.94                                                      | 0.89-0.99 |
| Cardiac Arrest, Heart Failure | 0.99                                                  | 0.93-1.06 | 0.99                                                       | 0.95-1.04 | 1.00                                                | 0.93-1.06 | 0.99                                                     | 0.95-1.03 | 0.99                                                 | 0.92-1.05 | 0.97                                                      | 0.92-1.03 |
| Respiratory Disease           | 1.04                                                  | 1.00-1.08 | 1.04                                                       | 1.01-1.07 | 1.05                                                | 1.01-1.10 | 1.05                                                     | 1.02-1.07 | 1.03                                                 | 0.98-1.08 | 1.04                                                      | 1.00-1.07 |
| COPD                          | 1.08                                                  | 1.03-1.14 | 1.06                                                       | 1.03-1.10 | 1.09                                                | 1.04-1.15 | 1.07                                                     | 1.03-1.10 | 1.07                                                 | 1.01-1.13 | 1.06                                                      | 1.01-1.11 |
| Pneumonia and Influenza       | 0.97                                                  | 0.87-1.08 | 1.00                                                       | 0.93-1.08 | 1.03                                                | 0.93-1.14 | 1.05                                                     | 0.98-1.12 | 0.95                                                 | 0.85-1.07 | 1.03                                                      | 0.95-1.14 |
| Lung Cancer                   | 0.96                                                  | 0.92-1.00 | 0.98                                                       | 0.95-1.01 | 0.96                                                | 0.92-1.00 | 0.97                                                     | 0.95-1.00 | 0.95                                                 | 0.91-0.99 | 0.96                                                      | 0.92-0.99 |

\*Adjusted for age, sex, and location, as strata; for race, BMI, education, smoking, diet, and marital status, at individual-level; and for median income and % with high school education, at census-tract level.

Table E2. All-cause and cause-specific mortality HRs associated with O<sub>3</sub> (per 10 ppb) with time-dependent and time-independent exposures, restricting the follow-up period to 2003-2011

| Cause                         | N     | Time-Dependent        |           |                            |           | Time-Independent      |           |                            |           |
|-------------------------------|-------|-----------------------|-----------|----------------------------|-----------|-----------------------|-----------|----------------------------|-----------|
|                               |       | Annual O <sub>3</sub> |           | Warm Season O <sub>3</sub> |           | Annual O <sub>3</sub> |           | Warm Season O <sub>3</sub> |           |
|                               |       | HR*                   | 95% CI*   | HR*                        | 95% CI*   | HR*                   | 95% CI*   | HR*                        | 95% CI*   |
| All-cause                     | 86566 | 0.98                  | 0.96-1.00 | 0.99                       | 0.98-1.00 | 0.99                  | 0.97-1.01 | 0.99                       | 0.99-1.01 |
| Cardiovascular Disease        | 26764 | 1.02                  | 0.99-1.05 | 1.02                       | 1.00-1.04 | 1.04                  | 1.01-1.07 | 1.03                       | 1.01-1.05 |
| Ischemic Heart Disease        | 14629 | 1.07                  | 1.03-1.11 | 1.05                       | 1.03-1.08 | 1.08                  | 1.04-1.13 | 1.06                       | 1.04-1.09 |
| Cerebrovascular Disease       | 4085  | 0.98                  | 0.92-1.06 | 1.01                       | 0.96-1.06 | 1.01                  | 0.94-1.09 | 1.02                       | 0.97-1.07 |
| Cardiac Arrest, Heart Failure | 4788  | 0.97                  | 0.90-1.04 | 0.98                       | 0.93-1.03 | 0.97                  | 0.90-1.05 | 0.98                       | 0.93-1.03 |
| Respiratory Disease           | 9332  | 1.01                  | 0.96-1.06 | 1.03                       | 0.99-1.06 | 1.04                  | 0.99-1.09 | 1.04                       | 1.01-1.08 |
| COPD                          | 5712  | 1.06                  | 1.00-1.12 | 1.06                       | 1.01-1.10 | 1.09                  | 1.03-1.16 | 1.07                       | 1.03-1.12 |
| Pneumonia and Influenza       | 1460  | 0.99                  | 0.89-1.12 | 1.04                       | 0.96-1.13 | 0.99                  | 0.89-1.12 | 1.04                       | 0.96-1.13 |
| Lung Cancer                   | 8560  | 0.97                  | 0.92-1.02 | 0.98                       | 0.94-1.01 | 0.98                  | 0.93-1.03 | 0.98                       | 0.94-1.01 |

\*Adjusted for age (as time-varying for the time-dependent model), sex, and location, as strata; for race, BMI, education, smoking, diet, and marital status, at individual-level; and for median income and % with high school education, at census-tract level.

Table E3. All-cause and cause-specific mortality HRs associated with O<sub>3</sub> (per 10 ppb), by study location region

| Cause                         | N     | California (n= 170,774) |           |                            |           | N     | North (n= 179,578)    |           |                            |           | N     | South (n=198,418)     |           |                            |           |
|-------------------------------|-------|-------------------------|-----------|----------------------------|-----------|-------|-----------------------|-----------|----------------------------|-----------|-------|-----------------------|-----------|----------------------------|-----------|
|                               |       | Annual O <sub>3</sub>   |           | Warm Season O <sub>3</sub> |           |       | Annual O <sub>3</sub> |           | Warm Season O <sub>3</sub> |           |       | Annual O <sub>3</sub> |           | Warm Season O <sub>3</sub> |           |
|                               |       | HR*                     | 95% CI*   | HR*                        | 95% CI*   |       | HR*                   | 95% CI*   | HR*                        | 95% CI*   |       | HR*                   | 95% CI*   | HR*                        | 95% CI*   |
| All-cause                     | 37437 | 0.99                    | 0.97-1.00 | 1.00                       | 0.99-1.01 | 41971 | 0.99                  | 0.94-1.03 | 1.02                       | 0.97-1.06 | 47398 | 0.98                  | 0.94-1.02 | 0.99                       | 0.97-1.03 |
| Cardiovascular Disease        | 11616 | 1.05                    | 1.02-1.08 | 1.04                       | 1.02-1.06 | 13247 | 0.94                  | 0.87-1.02 | 0.97                       | 0.89-1.05 | 14666 | 1.01                  | 0.93-1.09 | 0.99                       | 0.94-1.03 |
| Ischemic Heart Disease        | 6621  | 1.08                    | 1.04-1.12 | 1.06                       | 1.04-1.09 | 7492  | 0.99                  | 0.89-1.10 | 1.02                       | 0.92-1.14 | 8214  | 0.98                  | 0.88-1.09 | 0.96                       | 0.91-1.02 |
| Cerebrovascular Disease       | 1769  | 1.01                    | 0.94-1.08 | 1.02                       | 0.97-1.06 | 1716  | 0.87                  | 0.69-1.09 | 1.06                       | 0.84-1.34 | 2107  | 1.05                  | 0.85-1.29 | 1.02                       | 0.89-1.15 |
| Cardiac Arrest, Heart Failure | 1681  | 0.99                    | 0.92-1.06 | 1.00                       | 0.95-1.05 | 2570  | 1.06                  | 0.88-1.28 | 0.94                       | 0.78-1.14 | 2560  | 0.90                  | 0.74-1.09 | 0.92                       | 0.82-1.04 |
| Respiratory Disease           | 3925  | 1.02                    | 0.97-1.07 | 1.02                       | 0.99-1.05 | 3706  | 1.07                  | 0.92-1.25 | 1.16                       | 0.99-1.36 | 4828  | 1.17                  | 1.02-1.34 | 1.18                       | 1.08-1.28 |
| COPD                          | 2515  | 1.06                    | 1.00-1.13 | 1.04                       | 0.99-1.08 | 2169  | 1.13                  | 0.92-1.38 | 1.25                       | 1.02-1.53 | 3064  | 1.19                  | 1.01-1.42 | 1.18                       | 1.07-1.31 |
| Pneumonia and Influenza       | 695   | 1.02                    | 0.92-1.14 | 1.06                       | 0.98-1.14 | 550   | 0.69                  | 0.46-1.03 | 0.68                       | 0.45-1.01 | 644   | 1.05                  | 0.72-1.54 | 1.11                       | 0.88-1.40 |
| Lung Cancer                   | 3871  | 0.97                    | 0.92-1.01 | 0.97                       | 0.94-1.01 | 4287  | 0.97                  | 0.85-1.12 | 1.02                       | 0.88-1.17 | 5371  | 0.91                  | 0.80-1.03 | 0.95                       | 0.88-1.02 |

\*Adjusted for age, sex, and location, as strata; for race, BMI, education, smoking, diet, and marital status, at individual-level; and for median income and % with high school education, at census-tract level.
